# Supplementary material for: Equity of timely access to liver and stomach cancer surgery for Indigenous patients in New Zealand: a national cohort study
Source: HighWire-hosted journal article supplement (doi:10.1136/bmjopen-2021-058749), 2022-04-01
Supplement: bmjopen-2021-058749supp001_data_supplement.pdf [file bmjopen-2021-058749supp001_data_supplement.pdf]

**Supplementary Material 1:** Odds ratios comparing the likelihood of surgery receipt between Māori and European liver and stomach cancer patients, iteratively adjusted for covariates.

| Cancer            | Surgery Type                    | Māori vs. European Odds Ratios (95% CI) |                  |                  |                  |                  |                  |                  |
|-------------------|---------------------------------|-----------------------------------------|------------------|------------------|------------------|------------------|------------------|------------------|
|                   |                                 | Crude                                   | + Age            | + Sex            | + Deprivation    | + Rurality       | + Stage          | + Comorbidity    |
| Liver             | Received Any Primary Surgery    | 1.33 (1.13-1.57)                        | 0.9 (0.75-1.08)  | 0.89 (0.74-1.07) | 1.03 (0.85-1.24) | 1.01 (0.84-1.23) | 0.96 (0.77-1.19) | 0.94 (0.76-1.17) |
|                   | Received Any Curative Surgery   | 1.2 (0.96-1.49)                         | 0.8 (0.63-1.01)  | 0.8 (0.63-1.01)  | 0.93 (0.73-1.2)  | 0.93 (0.72-1.19) | 0.79 (0.56-1.12) | 0.79 (0.56-1.12) |
|                   | Major Hepatectomy               | 1.15 (0.75-1.76)                        | 0.81 (0.52-1.25) | 0.84 (0.54-1.3)  | 0.97 (0.61-1.56) | 0.94 (0.59-1.51) | 0.89 (0.53-1.49) | 0.89 (0.53-1.49) |
|                   | Minor Hepatectomy               | 1.83 (1.35-2.49)                        | 1.44 (1.05-1.97) | 1.46 (1.06-2)    | 1.68 (1.19-2.36) | 1.69 (1.2-2.38)  | 1.96 (1.26-3.04) | 1.96 (1.26-3.04) |
|                   | Percutaneous Drainage           | 1.37 (0.69-2.74)                        | 1.16 (0.57-2.38) | 1.16 (0.57-2.38) | 1.2 (0.55-2.58)  | 1.21 (0.56-2.62) | 1.15 (0.53-2.52) | 1.12 (0.51-2.47) |
|                   | Transplant                      | 0.59 (0.35-0.98)                        | 0.37 (0.22-0.64) | 0.35 (0.21-0.6)  | 0.39 (0.23-0.69) | 0.39 (0.22-0.68) | 0.34 (0.19-0.6)  | 0.33 (0.19-0.6)  |
|                   | Received Any Palliative Surgery | 1.16 (0.96-1.41)                        | 0.91 (0.74-1.12) | 0.89 (0.72-1.09) | 0.99 (0.79-1.23) | 0.98 (0.79-1.21) | 0.94 (0.75-1.17) | 0.93 (0.74-1.17) |
|                   | Liver Ablation                  | 1.19 (0.98-1.45)                        | 0.95 (0.77-1.16) | 0.92 (0.74-1.13) | 1 (0.8-1.25)     | 1 (0.8-1.24)     | 0.95 (0.76-1.2)  | 0.95 (0.75-1.2)  |
| Stomach           | Received Any Primary Surgery    | 1.5 (1.29-1.74)                         | 1.04 (0.89-1.23) | 1.06 (0.9-1.25)  | 1.11 (0.93-1.33) | 1.11 (0.93-1.32) | 0.98 (0.79-1.23) | 1.02 (0.81-1.27) |
|                   | Received Any Curative Surgery   | 1.49 (1.28-1.73)                        | 1.01 (0.86-1.19) | 1.03 (0.87-1.21) | 1.07 (0.9-1.28)  | 1.07 (0.89-1.28) | 0.92 (0.73-1.16) | 0.96 (0.76-1.21) |
|                   | Oesophagectomy                  | 0.22 (0.15-0.34)                        | 0.12 (0.08-0.18) | 0.13 (0.08-0.2)  | 0.12 (0.08-0.19) | 0.12 (0.08-0.2)  | 0.09 (0.06-0.15) | 0.1 (0.06-0.16)  |
|                   | Partial Gastrectomy             | 1.62 (1.34-1.96)                        | 1.47 (1.2-1.8)   | 1.43 (1.17-1.76) | 1.44 (1.15-1.79) | 1.45 (1.16-1.81) | 1.3 (1.01-1.66)  | 1.34 (1.04-1.73) |
|                   | Total Gastrectomy               | 1.74 (1.41-2.14)                        | 1.04 (0.82-1.3)  | 1.08 (0.86-1.36) | 1.15 (0.89-1.48) | 1.16 (0.9-1.49)  | 1.05 (0.8-1.39)  | 1.11 (0.84-1.46) |
|                   | Percutaneous Drainage           | 1.6 (0.75-3.41)                         | 1.44 (0.63-3.26) | 1.52 (0.67-3.44) | 1.69 (0.71-4.02) | 1.67 (0.7-3.98)  | 1.55 (0.64-3.77) | 1.61 (0.66-3.95) |
|                   | Received Any Palliative Surgery | 1.58 (1.22-2.05)                        | 1.35 (1.02-1.78) | 1.38 (1.04-1.83) | 1.54 (1.14-2.08) | 1.56 (1.16-2.12) | 1.46 (1.07-2)    | 1.46 (1.07-2)    |
|                   | Endoscopic Injection            | 1.07 (0.76-1.52)                        | 1.1 (0.76-1.59)  | 1.1 (0.76-1.6)   | 1.1 (0.74-1.63)  | 1.06 (0.71-1.58) | 1.07 (0.71-1.61) | 0.96 (0.63-1.45) |
| Enteroenterostomy | 2.18 (1.57-3.03)                | 1.67 (1.17-2.39)                        | 1.68 (1.17-2.41) | 2.04 (1.38-3)    | 2.1 (1.42-3.1)   | 1.9 (1.26-2.85)  | 1.98 (1.31-2.99) |                  |
